# Supplementary material for: Clinical and Molecular Genetic Analysis of Children with Severe Short Stature due to Isolated Growth Hormone Deficiency: Insights from a South Indian Cohort and Predictors of Growth Response.
Source: Research Square preprint supplement (doi:10.21203/rs.3.rs-7689542/v1), 2025-10-10
Supplement: Supplementary file 1 [file abc5e0f592a3f257826e5d3a.docx]

**Supplement 1. Comparison of prevalence of genetic variants in isolated growth hormone deficiency (Asian Studies)**

| **Study year** | **Region** | **IGHD - cohort size** | **Prevalence of genetic Variants** | |
| --- | --- | --- | --- | --- |
| **GHRHR** | **GH1** |
| 2013**[5]** | Indian Multicenter | 97 | 35% | 17.5% |
| 2016**[6]** | North India | 116 | 13.7% | 6.8% |
| 2017**[7]** | Western India  (MLPA) | 42 | 14.2% (deletions only) | 19%  (deletions only) |
| 2016, 2017**[8,9] *** | Sri Lanka | 95 | 13.8% | 7.2% |
| 2020**[10]** | Western India | 79 | 40.5% | 5% |
| **Present Study 2025** | **South India** | **63** | **39.7%** | **4.8%** |

*****combined data from de Silva et al.2016 and Sundaralingam et al. 2017 on the same Sri Lankan IGHD cohort (n=95)
